# Supplementary material
Source: PubMed Central journal article supplement (PMC4023745)
Supplement: AAC.02052-13_zac004142743so1.pdf [file AAC.02052-13_zac004142743so1.pdf]

## SUPPLEMENTARY MATERIAL

### *Escherichia coli* infection resistant to expanded-spectrum cephalosporins in low-prevalence countries

### *Escherichia coli* infection resistant to expanded-spectrum cephalosporins in low-prevalence countries

Benjamin A Rogers, Paul R Ingram, Naomi Runnegar, Matthew C Pitman, Joshua T Freeman, Eugene Athan, Sally N Havers, Hanna E Sidjabat, Mark Jones, Earleen Gunning, Mary De Almeida, Kaylene Styles, David L Paterson, on behalf of the Australasian Society for Infectious Diseases Clinical Research Network

## Supplementary Material

- A. Additional definitions
- B. Details of healthcare exposure by Friedman classification
- C. Comparison of multivariate models using alternative definitions
- D. Comparison of multivariate models using alternative patient groups
- E. Comparison of healthcare associated and non-healthcare associated ESC-R-EC
- F. Analysis of correlates of ESC resistance enzyme class
- G. References for Supplementary material

### A. Additional Definitions

**Chronic renal failure** was a baseline creatinine clearance  $<50\text{ml/min/m}^2$ ; **Chronic heart failure**(1), **chronic lung disease**(2) were based on published functional definitions; **Chronic liver disease** included a history of cirrhosis or hepatic decompensation; **Active malignancy** was any malignancy, except isolated skin malignancy;; **Indigenous** patients were members of the Australian Aboriginal, Maori or Torres Strait islander community. **Meat consumption** (red meat, poultry, pork and processed meat) was any consumption in the month preceding infection.

## SUPPLEMENTARY MATERIAL

### *Escherichia coli* infection resistant to expanded-spectrum cephalosporins in low-prevalence countries

#### **B. Healthcare exposure analysis using the Friedman classification**

Details of healthcare exposure using the Friedman classification with and without the inclusion of day-procedures as healthcare exposure.

| Time since exposure <sup>1</sup>                                 | Frequency in ESC-R Cases (%) n=91 | Frequency in ESC-S Controls (%) n=91 | Odds Ratio | (95% CI)     | p value |
|------------------------------------------------------------------|-----------------------------------|--------------------------------------|------------|--------------|---------|
| <b>Including day surgical and medical procedures<sup>2</sup></b> |                                   |                                      |            |              |         |
| No healthcare exposure                                           | 26 (29)                           | 42 (46)                              | Reference  |              |         |
| Healthcare <1 month ago                                          | 16 (18)                           | 7 (8)                                | 3.692      | (1.34-10.18) | 0.012   |
| 2-6 months ago                                                   | 40(44)                            | 30 (33)                              | 2.154      | (1.09-4.25)  | 0.027   |
| 7-12 months ago                                                  | 9 (10)                            | 12 (13)                              | 1.212      | (0.45-3.27)  | 0.705   |
| <b>Excluding day surgical and medical procedures<sup>3</sup></b> |                                   |                                      |            |              |         |
| No healthcare exposure                                           | 55 (60)                           | 34 (37)                              | Reference  |              |         |
| Healthcare <1 month ago                                          | 11 (12)                           | 5 (5)                                | 3.559      | (1.14-11.14) | 0.029   |
| 2-6 months ago                                                   | 37(41)                            | 20 (22)                              | 2.993      | (1.50-5.98)  | 0.002   |
| 7-12 months ago                                                  | 9 (10)                            | 11 (12)                              | 1.323      | (0.50-3.52)  | 0.575   |

<sup>1</sup>Durations are calculated from the date-of-discharge to date of first presentation of the current infection.

<sup>2</sup>With day-procedures: AUC = 0.62, Sensitivity = 62% Specificity = 59%.

<sup>3</sup>Without day-procedures: AUC = 0.64, Sensitivity=53% Specificity = 73%.

## SUPPLEMENTARY MATERIAL

### *Escherichia coli* infection resistant to expanded-spectrum cephalosporins in low-prevalence countries

#### C. Comparison of the final multivariate model and models using alternative definitions.

Parameters changed in the alternative models are underlined. Where the significance (of the odds ratios) has moved across the pre-defined (p=0.05) threshold when compared with the final model, this is shaded in grey.

| Final Model                                                             | Final Model<br>Odds Ratio<br>(95% CI)<br>p value | Alternative 1<br>Healthcare<br>Including day<br>procedures | Alternative 1<br>Odds Ratio<br>(95% CI)<br>p value | Alternative 2<br>Any healthcare<br>exposure in the<br>previous year | Alternative 2<br>Odds Ratio<br>(95% CI)<br>p value | Alternative 3<br>Birth in high-risk<br>regions | Alternative 3<br>Odds Ratio<br>(95% CI)<br>p value | Alternative 4<br>Travel to Indian<br>subcontinent | Alternative 4<br>Odds Ratio<br>(95% CI)<br>p value | Alternative 5<br>Exposure<br>TMP/SMX<br>without combining<br>ESC | Alternative 5<br>Odds Ratio<br>(95% CI)<br>p value |
|-------------------------------------------------------------------------|--------------------------------------------------|------------------------------------------------------------|----------------------------------------------------|---------------------------------------------------------------------|----------------------------------------------------|------------------------------------------------|----------------------------------------------------|---------------------------------------------------|----------------------------------------------------|------------------------------------------------------------------|----------------------------------------------------|
| Healthcare exposure in the previous 6 months (excluding day procedures) | 3.16<br>(1.54-6.46)<br>0.002                     | <u>Healthcare exposure in the previous 6 months</u>        | 2.22<br>(1.11-4.43)<br>0.023                       | <u>Any healthcare exposure in the previous year</u>                 | 1.90<br>(0.90-3.99)<br>0.092                       | As per final model                             | 2.68<br>(1.33-5.41)<br>0.006                       | As per final model                                | 2.58<br>(1.30-5.10)<br>0.006                       | As per final model                                               | 3.24<br>(1.59-6.60)<br>0.001                       |
| UTIs in previous year (per UTI)                                         | 1.43<br>(1.16-1.82)<br>0.003                     | As per final model                                         | 1.44<br>(1.14-1.83)<br>0.002                       | As per final model                                                  | 1.44<br>(1.14-1.83)<br>0.002                       | As per final model                             | 1.38<br>(1.09-1.75)<br>0.008                       | As per final model                                | 1.39<br>(1.10-1.75)<br>0.005                       | As per final model                                               | 1.43<br>(1.13-1.81)<br>0.003                       |
| Birth on the Indian subcontinent                                        | 11.13<br>(2.17-56.96)<br>0.004                   | As per final model                                         | 10.63<br>(2.08-54.26)<br>0.004                     | As per final model                                                  | 9.67<br>(1.91-48.95)<br>0.006                      | <u>Birth in high-risk regions</u>              | 2.05<br>(0.6-5.52)<br>0.0157                       | As per final model                                | 8.48<br>(1.43-50.41)<br>0.019                      | As per final model                                               | 10.60<br>(2.08-54.09)<br>0.005                     |
| Travel to high-risk regions                                             | 3.09<br>(1.29-7.38)<br>0.011                     | As per final model                                         | 2.60<br>(1.10-6.13)<br>0.029                       | As per final model                                                  | 2.65<br>(1.12-6.28)<br>0.027                       | As per final model                             | 2.76<br>(1.13-6.74)<br>0.026                       | <u>Travel to the Indian subcontinent</u>          | 2.99<br>(0.23-39.38)<br>0.23                       | As per final model                                               | 2.88<br>(1.21-6.85)<br>0.016                       |
| Trimethoprim +/- Sulfamethoxazole &/or ESC                              | 3.67<br>(1.30-10.35)<br>0.014                    | As per final model                                         | 3.75<br>(1.33-10.54)<br>0.012                      | As per final model                                                  | 3.57<br>(1.27-10.08)<br>0.016                      | As per final model                             | 3.48<br>(1.24-9.79)<br>0.018                       | As per final model                                | 3.10<br>(1.12-8.60)<br>0.003                       | <u>Trimethoprim +/- Sulfamethoxazole</u>                         | 2.66<br>(0.91-7.75)<br>0.073                       |
| Male sex                                                                | 2.17<br>(0.97-4.84)<br>0.060                     | As per final model                                         | 2.20<br>(0.99-4.87)<br>0.052                       | As per final model                                                  | 2.34<br>(1.07-5.13)<br>0.034                       | As per final model                             | 2.30<br>(1.05-5.06)<br>0.037                       | As per final model                                | 2.52<br>(1.14-5.54)<br>0.022                       | As per final model                                               | 2.31<br>(1.04-5.12)<br>0.039                       |
| Characteristics:<br>ROC AUC<br>GOF=Goodness of fit                      | 0.772<br>GOF=0.289                               |                                                            | 0.766<br>GOF = 0.36                                |                                                                     | 0.762<br>GOF = 0.15                                |                                                | 0.752<br>GOF=0.12                                  |                                                   | 0.7614<br>GOF=0.35                                 |                                                                  | 0.763<br>GOF=0.28                                  |

## SUPPLEMENTARY MATERIAL

### *Escherichia coli* infection resistant to expanded-spectrum cephalosporins in low-prevalence countries

#### D. Comparison of multivariate model using alternative patient groups

The group used in the alternative model is contained in the first row. Where the significance (of the odds ratios) has moved across the pre-defined ( $p=0.05$ ) threshold when compared with the final model, this is shaded in grey.

| Final Model                                                             | Final Model<br>Odds Ratio<br>(95% CI)<br>p value | Alternative 1<br>Exclusion of<br>asymptomatic<br>patients<br>Case n=73<br>Control n=68<br><br>Odds Ratio<br>(95% CI)<br>p value | Alternative3<br>Inclusion of only<br>CTX-M <i>E. coli</i><br>cases<br>Case n=74<br>Control n=91<br><br>Odds Ratio<br>(95% CI)<br>p value | Alternative3<br>Inclusion of only<br>ST131 <i>E. coli</i><br>cases<br>Case n=40<br>Control n=91<br><br>Odds Ratio<br>(95% CI)<br>p value |
|-------------------------------------------------------------------------|--------------------------------------------------|---------------------------------------------------------------------------------------------------------------------------------|------------------------------------------------------------------------------------------------------------------------------------------|------------------------------------------------------------------------------------------------------------------------------------------|
| Healthcare exposure in the previous 6 months (excluding day procedures) | 3.16<br>(1.54-6.46)<br>0.002                     | 3.66<br>(1.61-8.32)<br>0.002                                                                                                    | 6.62<br>(2.81-15.61)<br><0.001                                                                                                           | 7.67<br>(2.66-4.15)<br><0.001                                                                                                            |
| UTIs in previous year (per UTI)                                         | 1.43<br>(1.16-1.82)<br>0.003                     | 1.47<br>(1.10-1.95)<br>0.008                                                                                                    | 1.30<br>(0.99-1.72)<br>0.062                                                                                                             | 1.39<br>(1.01-1.92)<br>0.044                                                                                                             |
| Birth on the Indian subcontinent                                        | 11.13<br>(2.17-56.96)<br>0.004                   | 9.19<br>(2.02-57.42)<br>0.004                                                                                                   | 18.1<br>(3.21-102.04)<br>0.001                                                                                                           | 34.11<br>(5.25-221.49)<br><0.001                                                                                                         |
| Travel to high-risk regions                                             | 3.09<br>(1.29-7.38)<br>0.011                     | 2.60<br>(1.01-6.65)<br>0.047                                                                                                    | 5.72<br>(2.10-15.54)<br>0.001                                                                                                            | 4.10<br>(1.10-15.29)<br>0.036                                                                                                            |
| Trimethoprim +/- Sulfamethoxazole &/or ESC                              | 3.67<br>(1.30-10.35)<br>0.014                    | 3.02<br>(0.94-9.73)<br>0.064                                                                                                    | 3.91<br>(1.29-12.21)<br>0.016                                                                                                            | 3.52<br>(0.91-13.70)<br>0.069                                                                                                            |
| Male sex                                                                | 2.17<br>(0.97-4.84)<br>0.060                     | 2.56<br>(1.06-6.16)<br>0.036                                                                                                    | 2.09<br>(0.88-4.98)<br>0.095                                                                                                             | 2.17<br>(0.77-6.15)<br>0.143                                                                                                             |
| Characteristics:<br>ROC AUC<br>GOF=Goodness of fit                      | 0.772<br>GOF=0.289                               | 0.780<br>GOF = 0.247                                                                                                            | 0.818<br>GOF = 0.138                                                                                                                     | 0.830<br>GOF = 0.018                                                                                                                     |

SUPPLEMENTARY MATERIAL

*Escherichia coli* infection resistant to expanded-spectrum cephalosporins in low-prevalence countries

**E. Differences in risks between healthcare associated (HA) and non-healthcare associated (non-HA) ESC-R-EC groups after stratification by healthcare contact in the previous six months excluding day-procedures.**

| Potential Risk                                 | Healthcare associated cohort (n=73)         |                                                |                                          | Non-healthcare associated cohort (n=109)    |                                                |                                          |
|------------------------------------------------|---------------------------------------------|------------------------------------------------|------------------------------------------|---------------------------------------------|------------------------------------------------|------------------------------------------|
|                                                | Count of cases with characteristic n=48 (%) | Count of controls with characteristic n=25 (%) | p value for comparison case vs. controls | Count of cases with characteristic n=43 (%) | Count of controls with characteristic n=66 (%) | p value for comparison case vs. controls |
| Birth on the Indian subcontinent               | 2 (4)                                       | 0 (0)                                          | 0.543                                    | 9 (21)                                      | 2 (3)                                          | 0.006                                    |
| Travel to high-risk regions                    | 4 (8)                                       | 3 (12)                                         | 0.685                                    | 20 (47)                                     | 11 (17)                                        | 0.001                                    |
| Trimethoprim +/- Sulfamethoxazole &/or ESC use | 15 (31)                                     | 2 (8)                                          | 0.039                                    | 5 (12)                                      | 4(6)                                           | 0.313                                    |
| Male sex                                       | 16 (33)                                     | 7 (28)                                         | 0.642                                    | 14 (33)                                     | 9(14)                                          | 0.018                                    |
| UTIs in previous year (Count, 25-75%)          | 1, 0-3                                      | 1, 0-1                                         | 0.347                                    | 0, 0-3                                      | 0, 0-1                                         | 0.146                                    |

SUPPLEMENTARY MATERIAL

*Escherichia coli* infection resistant to expanded-spectrum cephalosporins in low-prevalence countries

**F. Analysis of correlates of ESC resistance enzyme class**

Comparing characteristics of patients harbouring CTX-M group enzymes to those harbouring ‘Non-CTX-M’ group enzymes.

| Variable                                                        | Frequency in CTX-M group (%) n=74 | Frequency in non-CTX-M group (%) n=15 | p value CTX-M vs. Non-CTX-M |
|-----------------------------------------------------------------|-----------------------------------|---------------------------------------|-----------------------------|
| <b><i>Variables included in the multivariate model</i></b>      |                                   |                                       |                             |
| Male Sex                                                        | 26 (35)                           | 4(27)                                 | 0.527                       |
| Charlson score $\geq 1$                                         | 38 (51)                           | 6(40)                                 | 0.423                       |
| Immune suppression                                              | 17 (23)                           | 1(7)                                  | 0.288                       |
| Anatomical or structural abnormality                            | 18(24)                            | 4(26)                                 | 1.0                         |
| UTIs in past 12 months (Median & (25-75 <sup>th</sup> centile)) | 0 (0-2)                           | 2(0-4)                                | 0.054                       |
| SXT use                                                         | 14 (19)                           | 2(13)                                 | 1.0                         |
| ESC use                                                         | 5 (7)                             | 2(13)                                 | 0.336                       |
| High risk travel                                                | 23(31)                            | 1(7)                                  | 0.061                       |
| Birth on Indian Subcontinent                                    | 11 (15)                           | 0(0)                                  | 0.199                       |
| Healthcare Exposure (6 months)                                  | 45(61)                            | 3(20)                                 | 0.005                       |
| <b><i>Other variables</i></b>                                   |                                   |                                       |                             |
| Age (Median & (25-75 <sup>th</sup> centile))                    | 60 (41-71)                        | 70(58-78)                             | 0.061                       |
| Any overseas travel                                             | 27 (36)                           | 1(7)                                  | 0.031                       |
| Any antimicrobial use                                           | 54 (73)                           | 14(93)                                | 0.108                       |
| Renal transplant                                                | 8 (11)                            | 0 (0)                                 | 0.342                       |
| Fluoroquinolone use                                             | 6(8)                              | 1(7)                                  | 1.0                         |
| $\beta$ -lactam + $\beta$ -lactamase inhibitor use              | 9 (12)                            | 5(33)                                 | 0.055                       |
| Carbapenem use                                                  | 3(4)                              | 0(0)                                  | 1.0                         |
| Aminoglycosides use                                             | 5(7)                              | 0(0)                                  | 0.584                       |
| Macrolide use                                                   | 4(5)                              | 1(7)                                  | 1.0                         |
| Narrow spectrum cephalosporin use                               | 13(18)                            | 2(13)                                 | 1.0                         |
| Narrow spectrum penicillins use                                 | 8(9)                              | 0(0)                                  | 0.342                       |
